# Supplementary material
Source: PubMed Central journal article supplement (PMC5600197)
Supplement: NIHMS900391-supplement-2.pdf [file NIHMS900391-supplement-2.pdf]

## **Supplementary Information**

### **Zika virus-encoded NS2A disrupts mammalian cortical neurogenesis by degrading adherens junction proteins**

Ki-Jun Yoon, Guang Song, Xuyu Qian, Jianbo Pan, Dan Xu, Hee Sool Rho, Nam-Shik Kim, Christa Habela, Lily Zheng, Fadi Jacob, Feiran Zhang, Emily M. Lee, Wei-Kai Huang, Francisca Rojas Ringeling, Caroline Vissers, Cui Li, Ling Yuan, Koeun Kang, Sunghan Kim, Junghoon Yeo, Yichen Cheng, Sheng Liu, Zhexing Wen, Cheng-Feng Qin, Qingfeng Wu, Kimberly M. Christian, Hengli Tang, Peng Jin, Zhiheng Xu, Jiang Qian, Heng Zhu, Hongjun Song and Guo-li Ming

#### **Inventory**

#### **Figures S1-6**

#### **Tables S1-4**

## Supplementary Figures

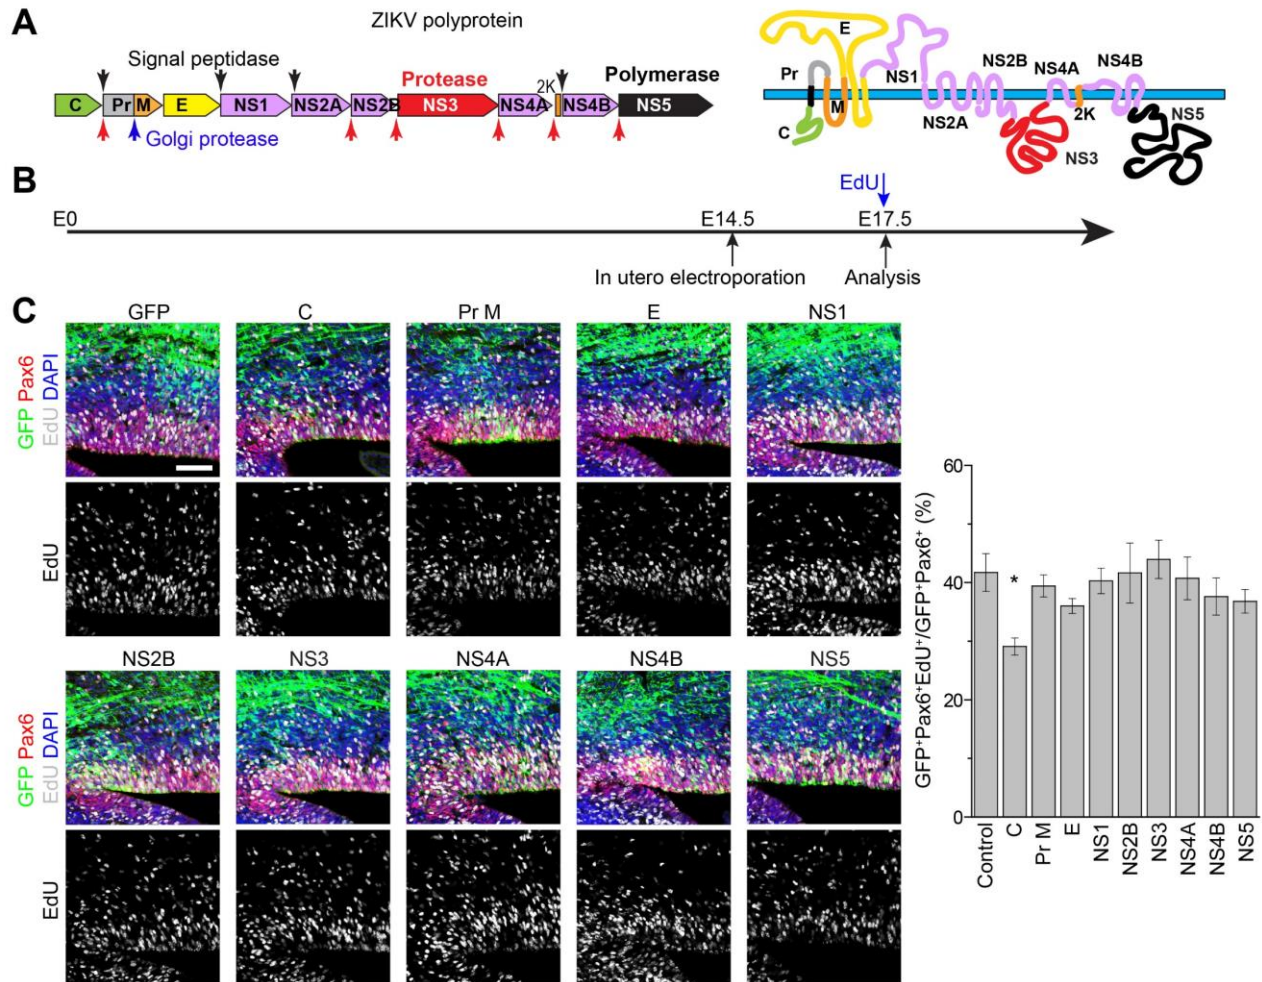

**Figure S1. Screen of individual ZIKV encoded proteins for regulation of mouse embryonic cortical radial glial cell proliferation in vivo, related to Figure 1.**

(A) A schematic diagram of the ZIKV polyprotein (left panel) and topological arrangement of individual viral proteins on the endoplasmic reticulum membrane (right panel).

(B) A schematic diagram of the procedure for in utero electroporation and analysis.

(C) Sample confocal images of immunostaining for Pax6, GFP, and staining for EdU and DAPI (left panels; scale bar: 100  $\mu$ m) and quantification (right panel) under different conditions. Embryonic mouse cortex was electroporated at E14.5 to express GFP, or GFP plus one ZIKV encoded protein, followed by EdU labeling 2 hr before analysis at E17.5. Values represent mean  $\pm$  SEM ( $n = 4-5$  animals; \* $P < 0.05$ ; Student's t-test).

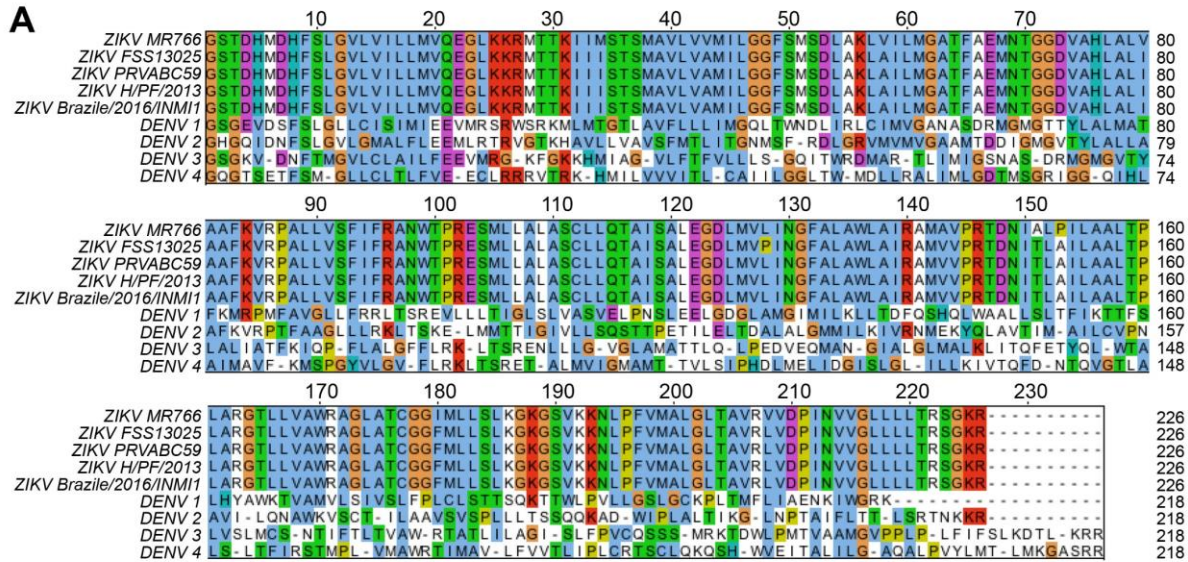

**Figure S2. Homology of NS2A proteins among different ZIKV and DENV strains, related to Figure 1.**

(A) Alignment of NS2A proteins from different ZIKV and DENV strains. ZIKV MR766: African origin; 2016/INMI1: Brazilian origin; PRVABC59: Puerto Rican origin; FSS13025: Cambodian origin; H/PF/2013: French Polynesian; DENV1-4: Dengue Virus Serotype 1-4.

(B) Quantification of differences at the protein coding level among NS2A proteins from different ZIKV and DENV strains, calculated by average distance using % identity of amino acids.

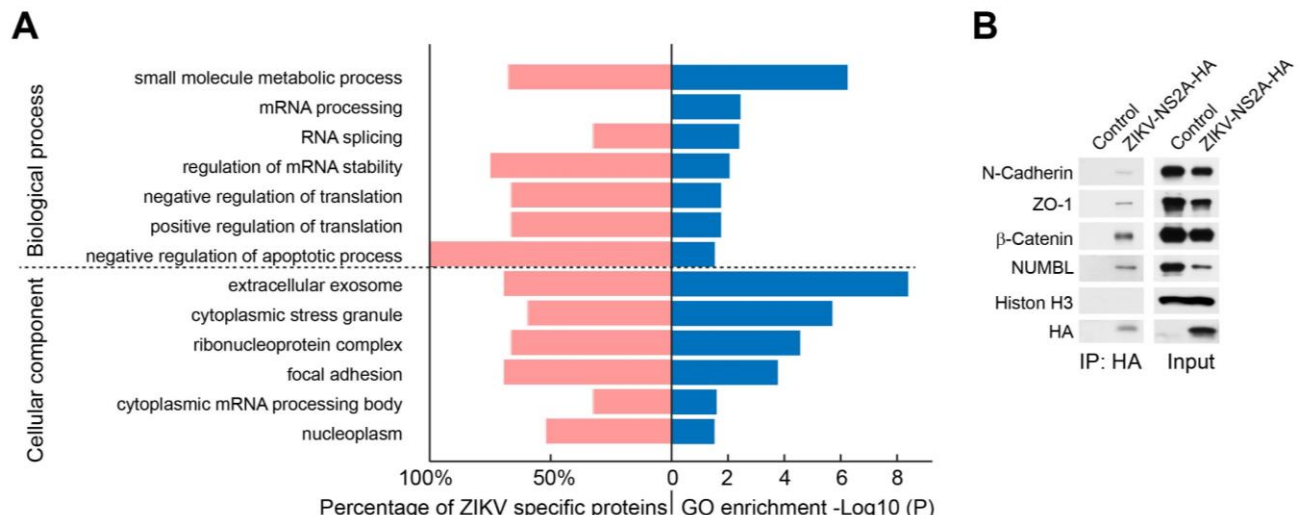

**Figure S3. GO analysis of protein-protein interactomes and validation of some interactions in mouse neural progenitors, related to Figure 3.**

(A) GO analysis of ZIKV-NS2A and DENV-NS2A interacting proteins for biological processes and cellular components. Quantifications of ZIKV-NS2A specific interacting proteins in these GO terms are also shown.

(B) Co-IP analysis of ZIKV-NS2A-HA with adherens junction complex components upon transfection of ZIKV-NS2A-HA into mouse cortical neural progenitors.

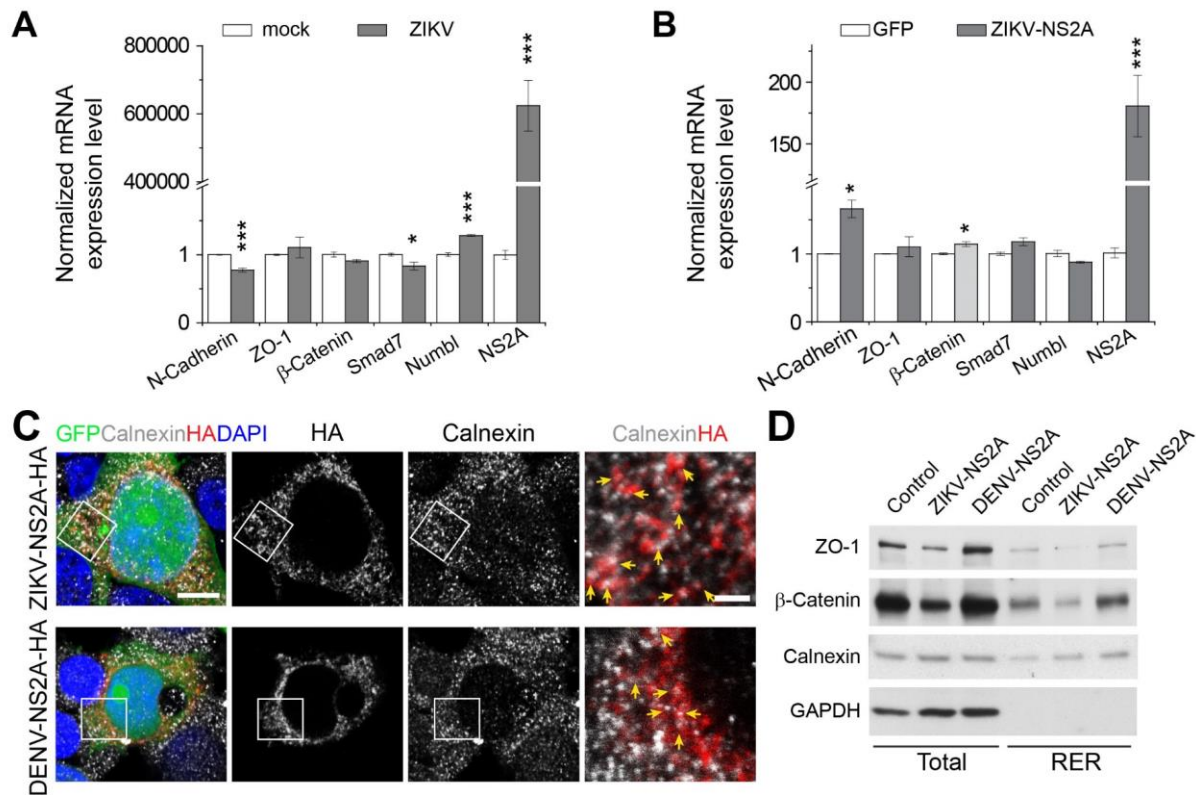

**Figure S4. Quantification of mRNA levels for adherens junction complex components and endoplasmic reticulum (ER) localization of ZIKV-NS2A and DENV-NS2A proteins, related to Figure 4.**

(A-B) Quantification of mRNA levels for adherens junction complex components upon ZIKV infection (A), or ZIKV-NS2A expression (B), in mouse neural progenitor cells by Q-PCR. Data were normalized to that of mock treatment for ZIKV infection (A), or to that of GFP alone for ZIKV-NS2A (B). Values represent mean  $\pm$  SEM (n = 4 experiments; \*\*\* $P$  < 0.001; \* $P$  < 0.05; One-way ANOVA). (C) Sample images of immunostaining of HA-tagged NS2A, Calnexin, an ER marker, and staining for DAPI (left panels; scale bar: 10  $\mu$ m). Magnified images are also shown (right panel; scale bar: 2  $\mu$ m). Arrows point to co-localized puncta.

(D) Reduced levels of adherens junction complex components with ER compartments upon expression of ZIKV-NS2A, but not DENV-NS2A. Sample western blot images of total cell lysates and the rough ER fractionation (RER) are shown.

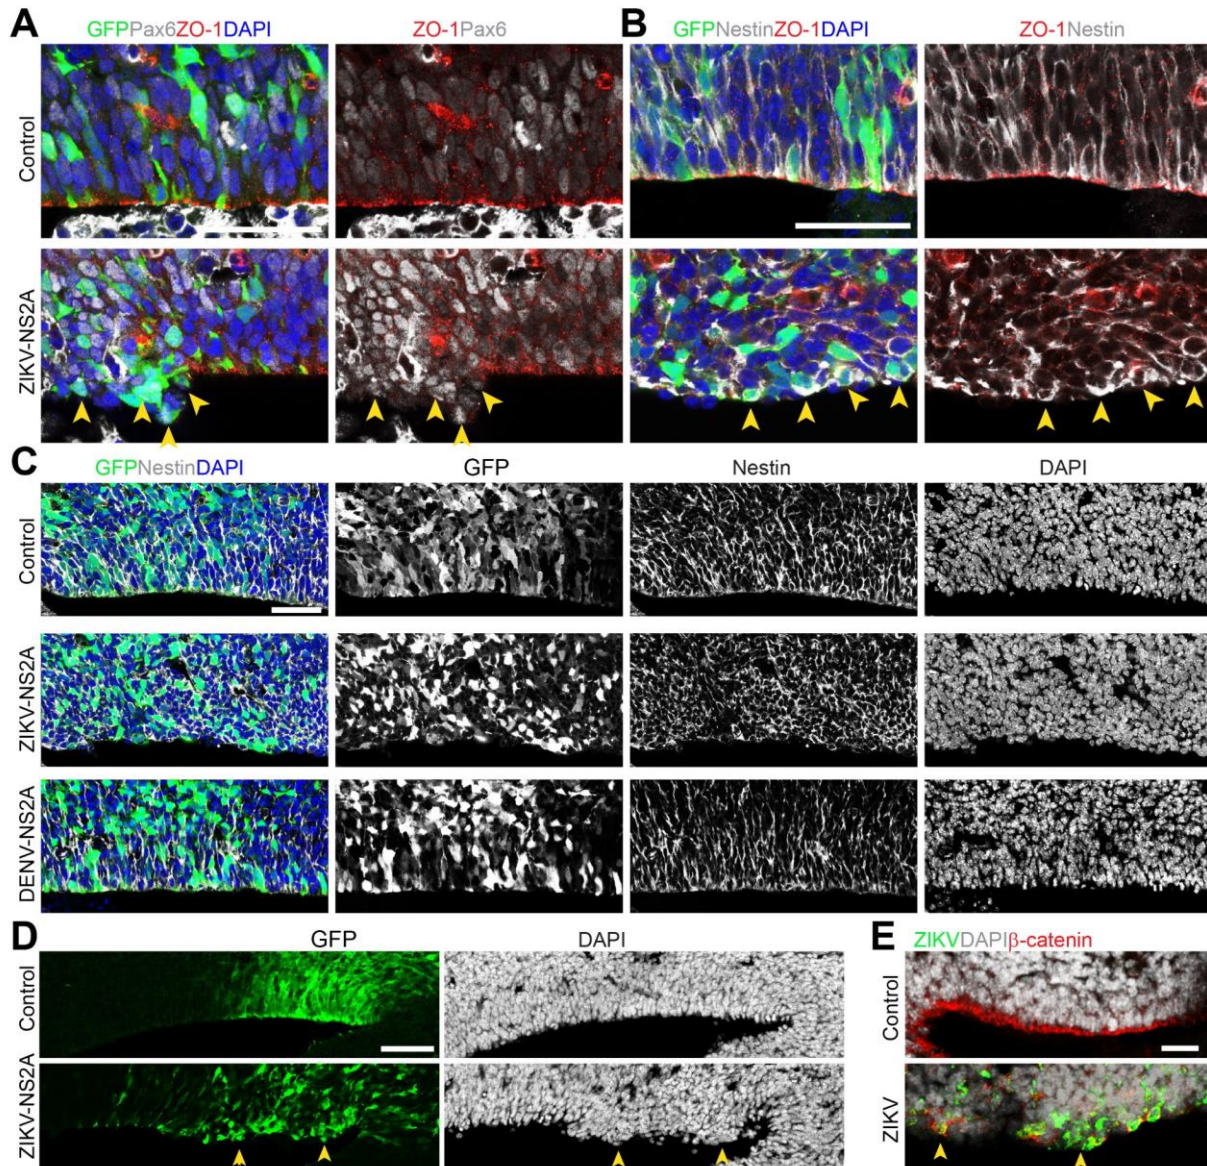

**Figure S5. Disruption of radial glial organization in the embryonic mouse cortex in vivo upon expression of ZIKV-NS2A or ZIKV infection, but not DENV-NS2A, related to Figure 5.**

(A-D) Embryonic mouse cortex was electroporated at E14.5 to express GFP, GFP and ZIKV-NS2A, or GFP and DENV-NS2A, and analyzed at E17.5. In (A, B), sample images of immunostaining for Pax6, ZO-1, Nestin and GFP, and staining for DAPI are shown. Scale bars: 50  $\mu$ m. Note the expression of ZO-1 in Pax6<sup>+</sup> or Nestin<sup>+</sup> radial glial cells expressing GFP, but not those co-expressing GFP and ZIKV-NS2A (highlighted by arrows). In (C), sample images of immunostaining for Nestin, GFP and staining for DAPI are shown. Scale bar: 50  $\mu$ m. Note disorganized radial fibers upon ZIKV-NS2A expression. In (D), sample images of GFP immunostaining and DAPI staining are shown. Scale bar: 50  $\mu$ m. Arrows point to regions with ventricular protrusions.

(E) ZIKV-SZ strain or PBS was injected into the lateral ventricles of E13.5 ICR mice and examined at P3. Sample images of immunostaining for ZIKV and  $\beta$ -catenin and DAPI are shown. Scale bar: 25  $\mu$ m. Arrows point to regions with ventricular protrusions.

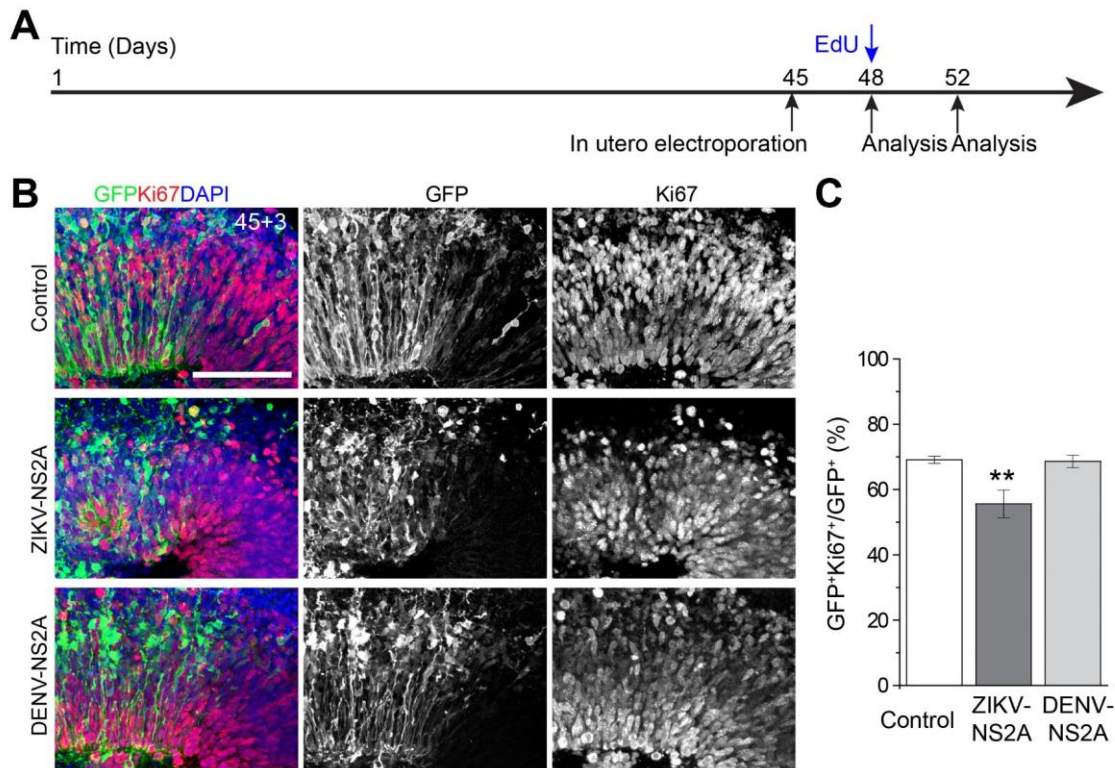

**Figure S6. Expression of ZIKV-NS2A, but not DENV-NS2A, affects proliferation of ventricular RGCs in human forebrain organoids, related to Figure 6.**

(A) A schematic diagram of the experimental procedure.

(B) Sample images of immunostaining for cell proliferation marker Ki67, GFP, and staining for DAPI for samples at 45+3 days. Scale bar: 100  $\mu$ m. Note the disorganization of GFP<sup>+</sup> radial fibers upon ZIKV-NS2A expression (middle panel).

(C) Quantification of proliferation at 45+3 days. Values represent mean  $\pm$  SEM (n = 10 organoids; \*\* $P < 0.01$ ; Student's t-test).

## Supplementary Tables

**Table S1. List of primers used to clone ORFs of ZIKV encoded proteins and primers used for Q-PCR analysis, related to STAR Methods. (See the Excel file).**

**Table S2. List of ZIKV-NS2A and DENV-NS2A interacting proteins across the human proteome, related to Figure 3. (See the Excel file).**

**Table S3. List of gene ontology enrichment terms for ZIKV-NS2A and DENV-NS2A binding proteins, related to Figure 3. (See the Excel file).**

**Table S4. List of ZIKV-NS2A interacting proteins within the functional protein association network, related to Figure 3. (See the Excel file).**
